# Supplementary material for: The influence of alkalinity and water hardness interactions on salinity toxicity
Source: MDPI journal article supplement (doi:10.3390/cancers15174385), 1996-01-01
Supplement: s1 [file s1]

## Supplementary Materials

Wang et al.

### Supplemental Figures

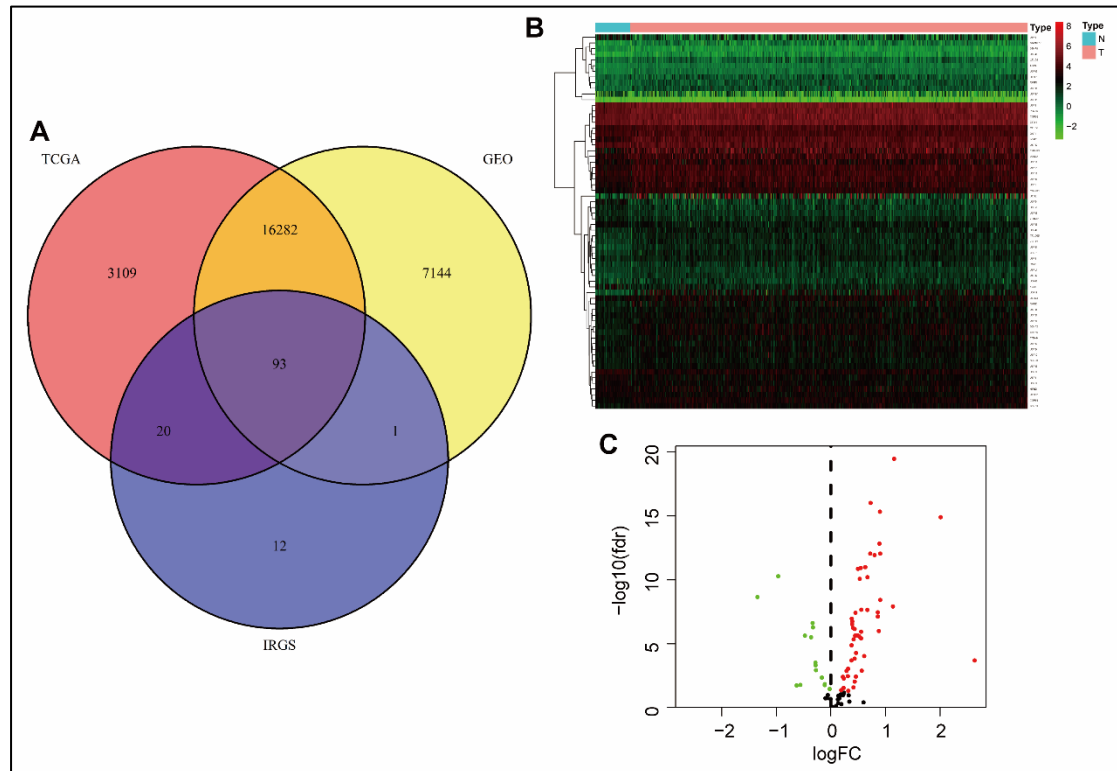

**Figure S1** The chosen process of DAGs. **(A)** Venn diagram showing overlap of the genes expressed in HNSCC patients among TCGA, GEO and all DUBs; **(B-C)** Heat map and volcano plot showing 66 DAGs that were related to overall survival of HNSCC patients after univariate Cox regression;

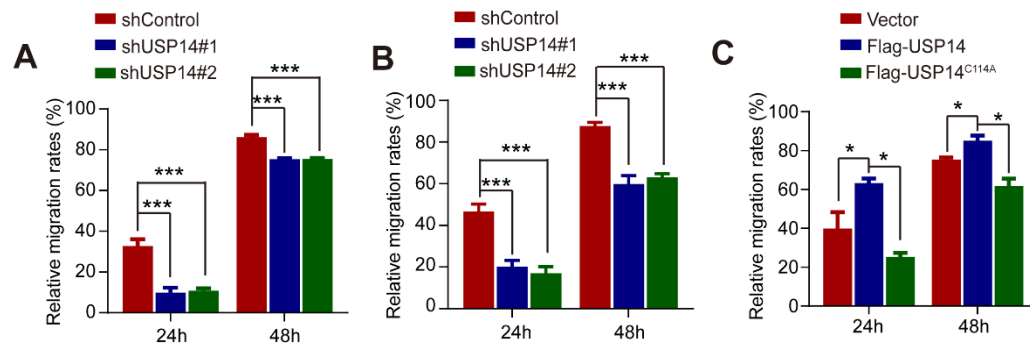

**Figure S2** Quantitative analysis of scratch healing assay to estimate the migration of TU686(A) , Cal-27(B), and TU177 (C) cells.

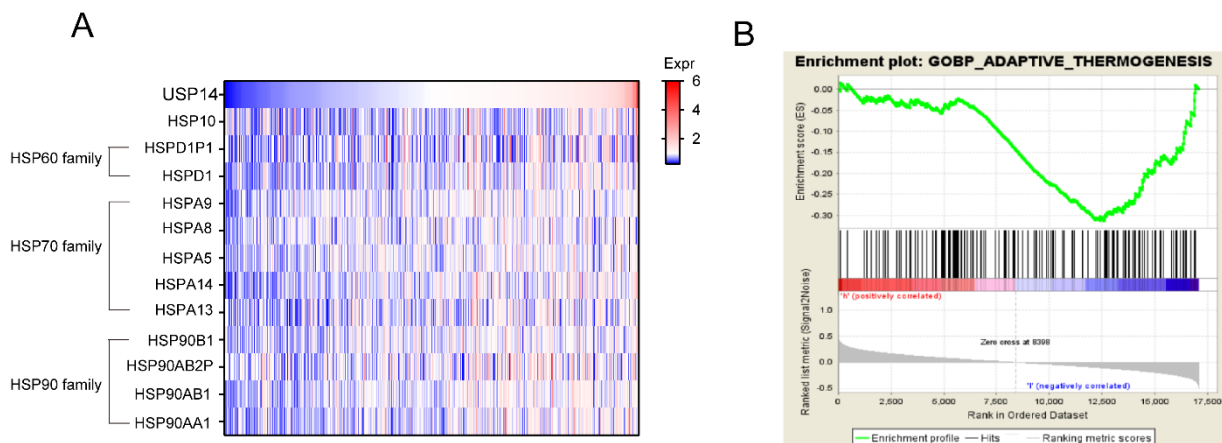

**Figure S3** Identification of the downstream of USP14 regulated in HNSCC. (A) Heat map of differences in HSP-related proteins in TCGA database. (B) Gene set enrichment analysis (GSEA) revealed that adaptive thermogenesis pathway was enriched in patients with high expression of USP14 in GSE39366 database.

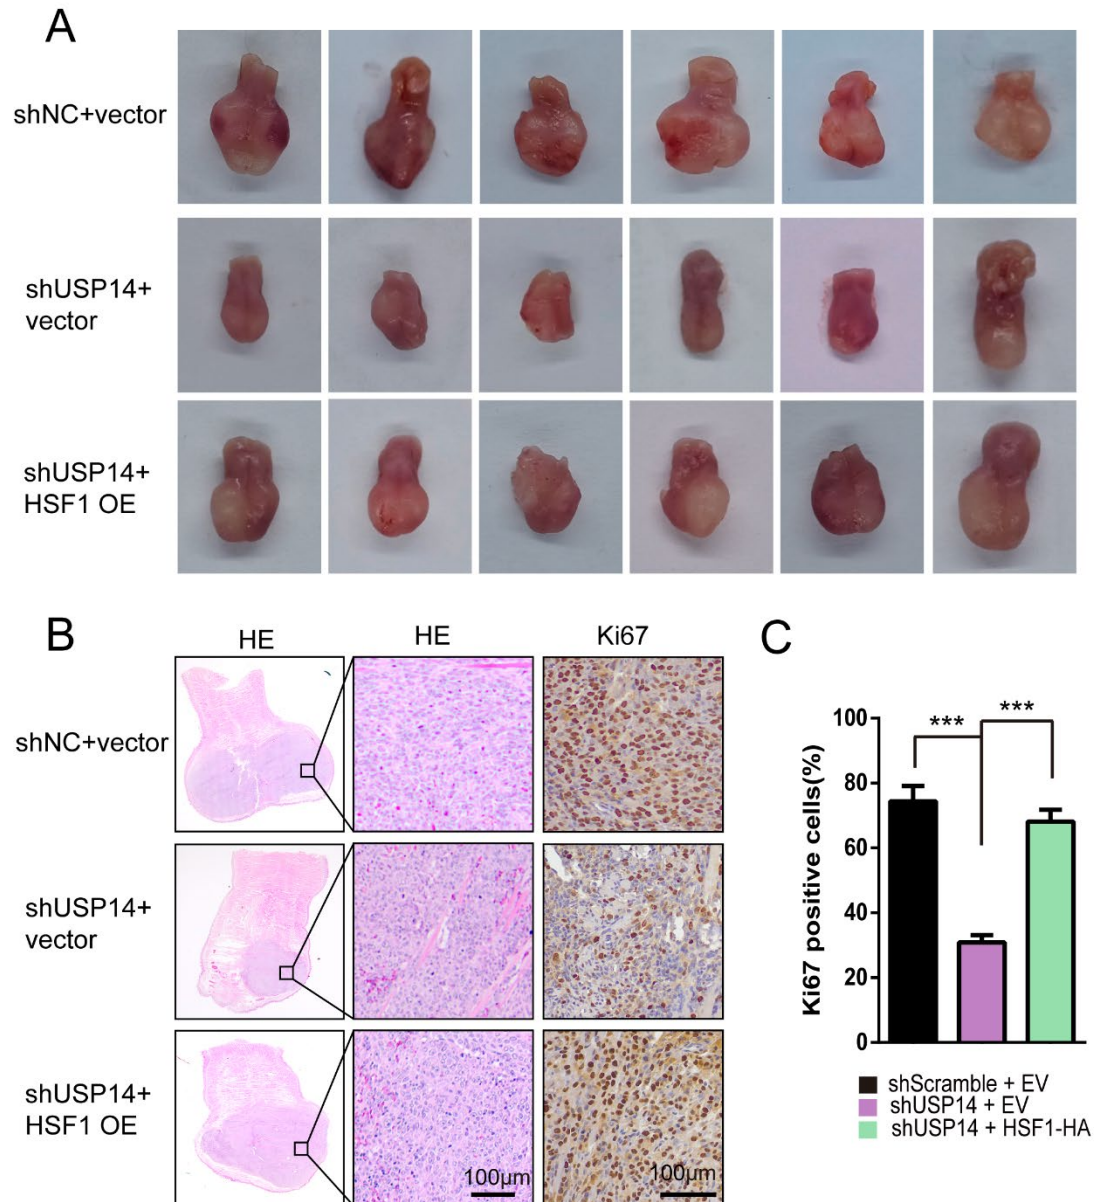

**Figure S4** Orthotopic xenograft showed overexpression of HSF1 restored the inhibitory effect of USP14 depletion in growth of HNSCC cells in vivo. A. After 18 days, the orthotopic tumors on the tongue of nude mice were extracted and visually documented (n=6). B. H&E staining and IHC assays (Ki-67) were performed on orthotopic tumors derived from the three groups of cells. C. The percentage of Ki67-positive cells were calculated ( \* indicates  $p < 0.05$ , \*\* indicates  $p < 0.001$  and \*\*\* indicates  $p < 0.0001$ ).

## Supplemental Tables

**Table S1.** The primers used in the study.

| gene           | primer                        |
|----------------|-------------------------------|
| USP14          | GAGTTGGACCTTTCCAGA            |
| USP14          | TGCTTGCACAGATGTGA             |
| HSF1           | CCAGGAACTGGAAAGGCACTA         |
| HSF1           | CAGTGGTTGGTCCCAGTCTT          |
| HSP60          | GTGCTAATCCTGTTGGCATTG         |
| HSP60          | CCTGCGCGATTTCTTTCTTAC         |
| HSP70          | CGGCTCCGCTCTGAGATT            |
| HSP70          | CTGCGACAGTCCACTACCTT          |
| HSP90          | TCG CGG CAA AGA ACT CAC TT    |
| HSP90          | TTC TCA TCC TCG ACA CTG CTC T |
| $\beta$ -actin | GAC TCC GGT CCT ATT TTG TGG   |
| $\beta$ -actin | GCT AGT TGG CAT CGT TTA TGG   |

**Table S2. Association between USP14 expression and clinicopathological features of patients with HNSCC**

| Clinicopathological features | n  | USP14 expression |      | P-value       |
|------------------------------|----|------------------|------|---------------|
|                              |    | Low              | High |               |
| Age, years                   |    |                  |      | 0.8961        |
| ≥60                          | 27 | 13               | 14   |               |
| < 60                         | 16 | 9                | 7    |               |
| Sex                          |    |                  |      | 1             |
| Male                         | 42 | 21               | 21   |               |
| Female                       | 1  | 1                | 0    |               |
| Histological grade           |    |                  |      | 0.3598        |
| G1                           | 28 | 14               | 14   |               |
| G2+G3                        | 15 | 8                | 7    |               |
| T                            |    |                  |      | 0.5116        |
| T1                           | 12 | 9                | 3    |               |
| T2                           | 19 | 6                | 13   |               |
| T3                           | 7  | 4                | 3    |               |
| T4                           | 5  | 3                | 2    |               |
| M                            |    |                  |      | 1             |
| M0                           | 43 | 22               | 21   |               |
| Lymph node metastasis        |    |                  |      | <b>0.0039</b> |
| N0                           | 30 | 20               | 10   |               |
| N1                           | 4  | 2                | 2    |               |
| N2                           | 9  | 0                | 9    |               |
| Cancer stage                 |    |                  |      | <b>0.0438</b> |
| I+II+III                     | 30 | 19               | 11   |               |
| IV                           | 13 | 3                | 10   |               |
| Infiltration                 |    |                  |      | 0.3119        |

|                         |    |             |               |
|-------------------------|----|-------------|---------------|
| submucosa               | 11 | 8           | 3             |
| superficial muscularis  | 9  | 3           | 6             |
| deep muscularis         | 12 | 6           | 6             |
| whole layer             | 11 | 4           | 7             |
| Tissues type            |    |             | <b>0.0012</b> |
| Cancer                  | 43 | 22.98±0.492 |               |
| Adjacent normal tissues | 43 | 7.349±0.268 |               |

**Table S3. Association between HSF1 expression and clinicopathological features of patients with HNSCC**

| Clinicopathological features | n  | HSF1 expression |      | P-value            |
|------------------------------|----|-----------------|------|--------------------|
|                              |    | Low             | High |                    |
| Age, years                   |    |                 |      | 0.5617             |
| ≥60                          | 28 | 13              | 15   |                    |
| < 60                         | 16 | 9               | 7    |                    |
| Sex                          |    |                 |      | 1                  |
| Male                         | 42 | 21              | 20   |                    |
| Female                       | 1  | 1               | 0    |                    |
| Histological grade           |    |                 |      | 0.1395             |
| G1                           | 29 | 12              | 17   |                    |
| G2+G3                        | 15 | 9               | 6    |                    |
| T stage                      |    |                 |      | 0.6638             |
| T1                           | 13 | 6               | 7    |                    |
| T2                           | 19 | 7               | 12   |                    |
| T3                           | 7  | 6               | 1    |                    |
| T4                           | 5  | 3               | 2    |                    |
| M                            |    |                 |      | 1                  |
| M0                           | 44 | 44              | 0    |                    |
| N stage                      |    |                 |      | <b>0.0146</b>      |
| N0                           | 31 | 16              | 15   |                    |
| N1                           | 4  | 3               | 1    |                    |
| N2                           | 9  | 3               | 6    |                    |
| cancer stage                 |    |                 |      | <b>0.0276</b>      |
| I+II+III                     | 31 | 16              | 15   |                    |
| IV                           | 13 | 6               | 7    |                    |
| Infiltration                 |    |                 |      | 0.6539             |
| submucosa                    | 11 | 6               | 5    |                    |
| superficial muscularis       | 10 | 3               | 7    |                    |
| deep muscularis              | 12 | 7               | 5    |                    |
| whole layer                  | 11 | 6               | 5    |                    |
| Tissues type                 |    |                 |      | <b>&lt; 0.0001</b> |
| Cancer                       | 44 | 15.549±0.285    |      |                    |
| Adjacent normal tissues      | 44 | 4.252±0.101     |      |                    |
